# Supplementary material for: Genomic Analysis of Metastatic Cutaneous Squamous Cell Carcinoma
Source: Oxford University Press journal article supplement (doi:10.1158/1078-0432.ccr-14-1773), 2015-01-15
Supplement: 10780432ccr141773-sup-134341_2_supp_0_nhtbbl.docx [file 10780432ccr141773-sup-134341_2_supp_0_nhtbbl.docx]

Supplementary Figure 1 – *ARID5B* and *CARD11* alterations associated with PFS in metastatic cSCC.

Kaplan-Meier survival curves of metastatic cSCC patients comparing patients with or without alteration (mutation or copy number change) in *ARID5B* and *CARD11*. We also show the distribution of alterations of each gene across the samples.

Supplementary Figure 2 – Alterations in RTK/RAS/PI3K pathway and chromatin remodeling genes associated with overall survival (OS) in metastatic cSCC.

Kaplan-Meier survival curves of metastatic cSCC patients comparing patients with or without mutation in A) RTK/RAS/PI3K pathway, B) chromatin remodeling genes, or C) both.
